# Supplementary material for: Using CoS cathode materials with 3D hierarchical porosity and an ionic liquid (IL) as an electrolyte additive for high capacity rechargeable magnesium batteries
Source: Royal Society of Chemistry journal article supplement (doi:10.1039/c9ta05233j), 2019-01-01
Supplement: c9ta05233j1.pdf [file c9ta05233j1.pdf]

## Supporting Information

### **Using CoS cathode materials with 3D hierarchical porosity and an ionic liquid (IL) as electrolyte additive for high capacity rechargeable magnesium batteries**

Mingguang Pan,<sup>ab</sup> Jianxin Zou,<sup>\*ab</sup> Richard Laine,<sup>\*c</sup> Darvaish Khan,<sup>ab</sup> Rui Guo,<sup>d</sup> Xiaoqin Zeng,<sup>ab</sup> and Wenjiang Ding<sup>ab</sup>

**Table S1.** Performance comparison of different TMC electrode materials for RMBs.

| Electrode material<br>(Ref.)                                                                        | Electrolyte                                            | Voltage range<br>(V vs.<br>Mg <sup>2+</sup> /Mg) | Current<br>density<br>(mA g <sup>-1</sup> ) | Capacity (mAh g <sup>-1</sup> )<br>(Cycle number) |
|-----------------------------------------------------------------------------------------------------|--------------------------------------------------------|--------------------------------------------------|---------------------------------------------|---------------------------------------------------|
| <b>CoS<sub>HE</sub></b><br><b>(this work)</b>                                                       | <b>0.25M POC-0.2IL</b>                                 | <b>0.0-1.8</b>                                   | <b>20</b>                                   | <b>~134 (1)~360(68-85)</b>                        |
| CoS<br>( <i>J. Power Sources</i> , 2015,<br><b>294</b> , 643)                                       | 0.25 M<br>Mg(AlCl <sub>2</sub> EtBu) <sub>2</sub> /THF | 0.1-2.0                                          | 50                                          | ~120 (1)-106 (60)                                 |
| Mo <sub>6</sub> S <sub>8</sub><br>( <i>Nature</i> , 2000, <b>407</b> , 724)                         | 0.25 M<br>Mg(AlCl <sub>2</sub> EtBu) <sub>2</sub> /THF | 0.3-1.8                                          | 0.3 mA<br>cm <sup>-2</sup>                  | ~60 (1-200)~55(580)                               |
| graphene-like MoS <sub>2</sub><br>( <i>Adv. Mater.</i> , 2011, <b>23</b> ,<br>640)                  | Mg(AlCl <sub>3</sub> Bu) <sub>2</sub> /THF             | 0.5-3.0                                          | 20                                          | 170 (1)-161 (50)                                  |
| VS <sub>4</sub><br>( <i>Adv. Mater.</i> , 2018, <b>30</b> ,<br>1802563)                             | 0.4 M APC in THF                                       | 0.2-2.2                                          | 100                                         | 251(1)-150(180)                                   |
| WSe <sub>2</sub> nanowires<br>( <i>ACS Nano</i> , 2013, <b>7</b> ,<br>8051)                         | 0.25 M<br>Mg(AlCl <sub>2</sub> EtBu) <sub>2</sub> /THF | 0.3-3.0                                          | 50                                          | ~220 (1)-203 (160)                                |
| layered TiS <sub>2</sub> (60 °C)<br>( <i>ACS Energy Lett.</i> , 2016, <b>1</b> ,<br>297)            | 0.4 M APC in<br>tetraglyme                             | 0.4-1.8                                          | 47.8                                        | 250 (1)~110 (40)                                  |
| interlayer-expanded TiS <sub>2</sub><br>( <i>Nat. Commun.</i> , 2017, <b>8</b> ,<br>339)            | 0.25 M APC in THF                                      | 0.0-2.0                                          | 240                                         | ~155 (1)~114(500)                                 |
| Ti <sub>2</sub> S <sub>4</sub> (60 °C)<br>( <i>Energy Environ. Sci.</i> ,<br>2016, <b>9</b> , 2273) | 0.4 M APC in<br>tetraglyme                             | 0.5-1.8                                          | 24                                          | 190 (1)-140(40)                                   |
| CuS (50 °C)<br>( <i>Nano Energy</i> , 2018, <b>47</b> ,<br>210)                                     | 0.25M APC/THF                                          | 0.2-1.9                                          | 50                                          | ~105 (1)-119 (30)                                 |
| CuS nanosheet assemblies<br>( <i>Appl. Mater. Interfaces</i> ,<br>2019, <b>11</b> , 7046)           | 0.25 M<br>Mg(AlCl <sub>2</sub> EtBu) <sub>2</sub> /THF | 0.0-2.0                                          | 20                                          | 400 (1)-336 (15)                                  |

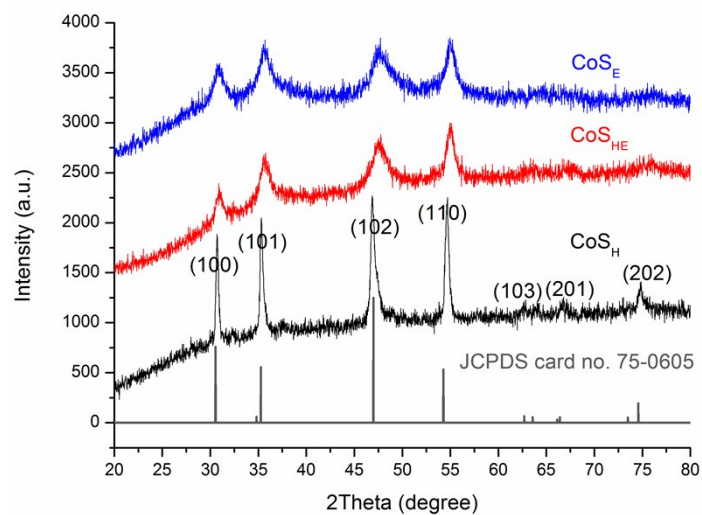

**Figure S1.** XRD patterns of  $\text{CoS}_\text{H}$ ,  $\text{CoS}_\text{HE}$  and  $\text{CoS}_\text{E}$ .

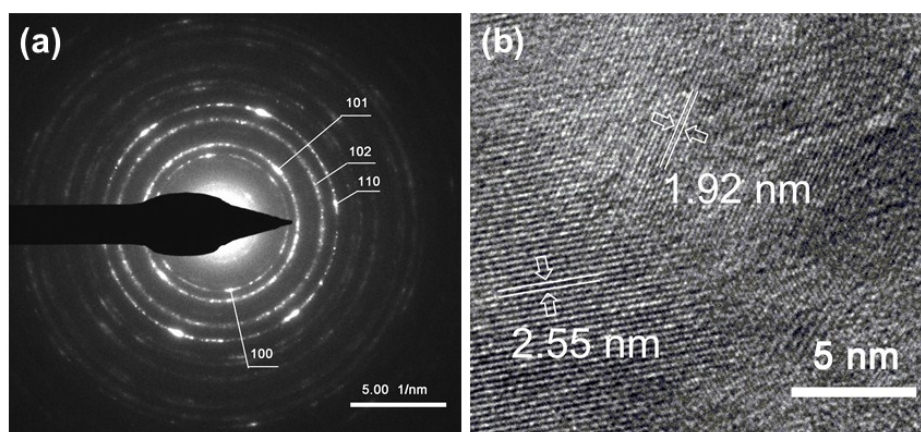

**Figure S2.** SAED (a) and HRTEM (b) images of  $\text{CoS}_\text{HE}$ .

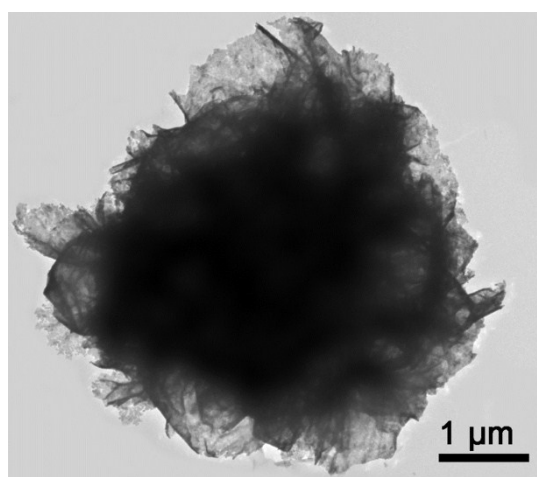

**Figure S3.** TEM image of  $\text{CoS}_\text{HE}$  sphere ( $\sim 4.5 \mu\text{m}$  diameter).

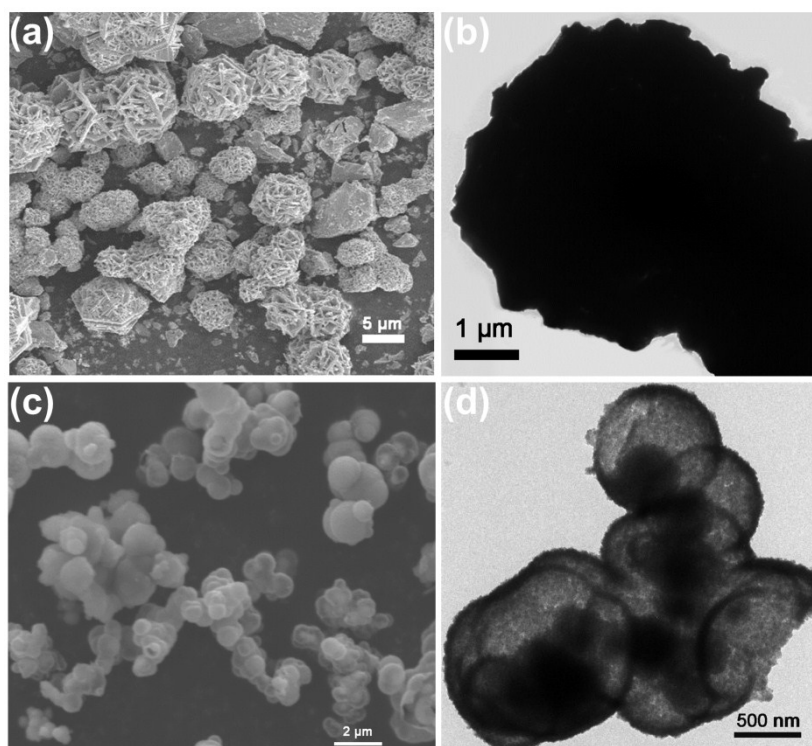

**Figure S4.** SEM (a,c) and TEM(b,d) images of  $\text{CoS}_\text{H}$  (a,b) and  $\text{CoS}_\text{E}$  (c,d).

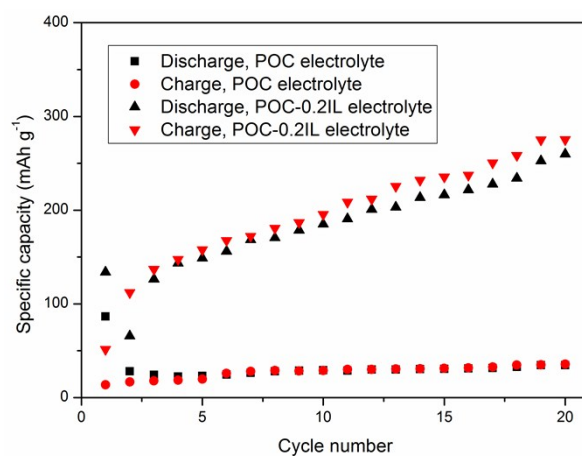

**Figure S5.** The cycling process (20 cycles) of  $\text{CoS}_\text{HE}$  cathode in POC electrolyte (■, Discharge; ●, Charge) and POC-0.2IL electrolyte (▲, Discharge; ▼, Charge).

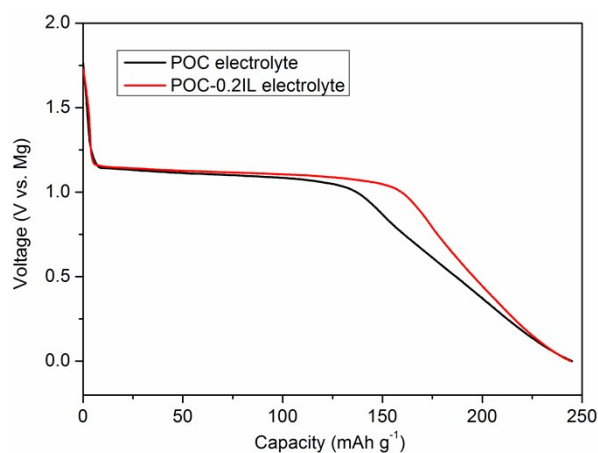

**Figure S6.** The discharge curves of  $\text{CoS}_{\text{HE}}$  cathode in POC-0.2IL electrolyte (red) and POC electrolyte (black) when discharging nearly identical capacity (around  $245 \text{ mAh g}^{-1}$ ) at a current density of  $20 \text{ mA g}^{-1}$ .

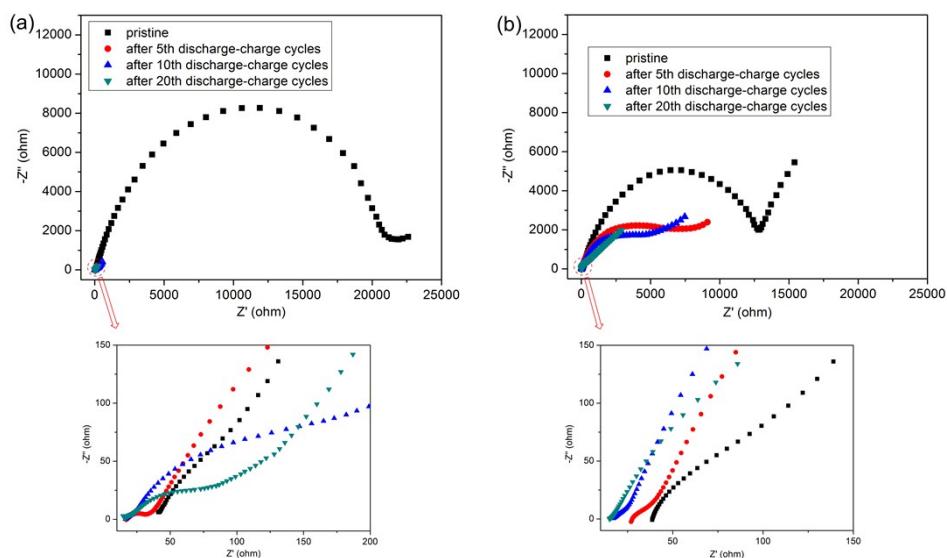

**Figure S7.** The EIS curve changes of  $\text{CoS}_{\text{HE}}$  cathode in (a) POC-0.2IL electrolyte and (b) POC electrolyte during the initial 20 cycles. The bottom is the enlarged parts for the dotted circle in (a) and (b), respectively.

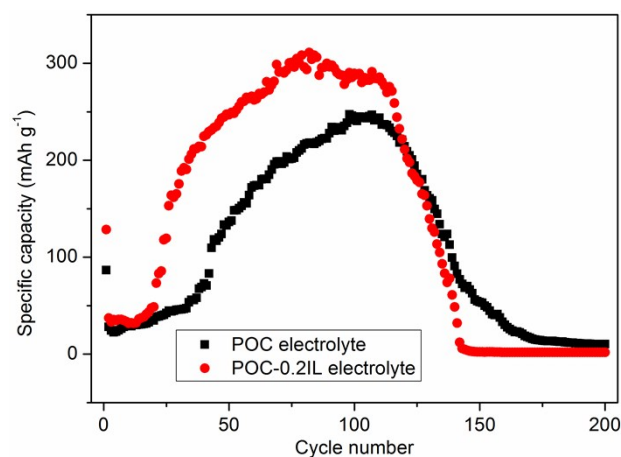

**Figure S8.** The discharge performances of  $\text{CoS}_{\text{HE}}$  cathode in POC-0.2IL electrolyte (red) and POC electrolyte (black).

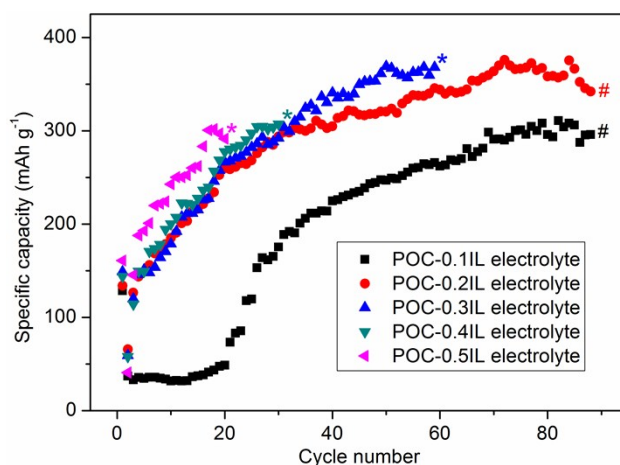

**Figure S9.** The discharge performances of CoS<sub>HE</sub> cathode in POC-0.1IL (■), POC-0.2IL (●), POC-0.3IL (▲), POC-0.4IL (▼) and POC-0.5IL (▲) electrolytes, respectively. The marks, # and \* in the figure denote that the batteries are still working and going to be dead, respectively.

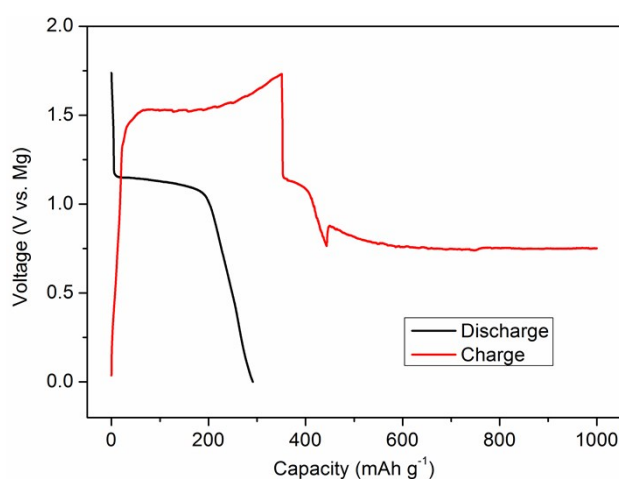

**Figure S10.** The discharge-charge curves of CoS<sub>HE</sub> with POC-0.5IL electrolyte in the last cycle (20th).

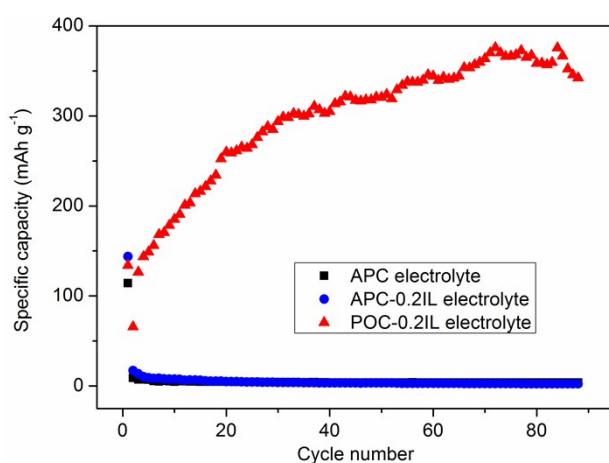

**Figure S11.** The discharge performances of CoS<sub>HE</sub> cathode in APC (■), APC-0.2IL (●) and POC-0.5IL (▲) electrolytes, respectively.

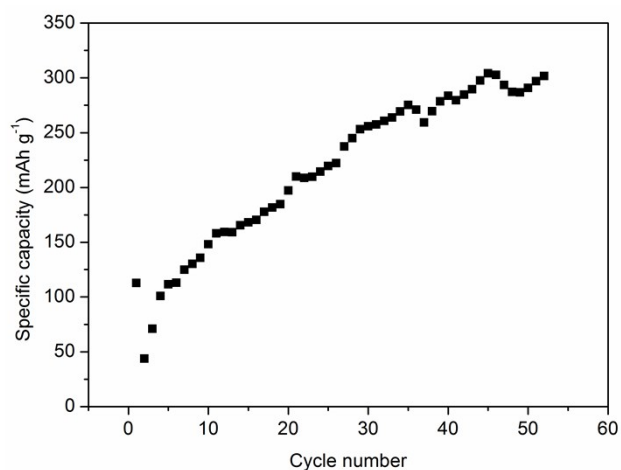

**Figure S12.** The discharge performances of  $\text{CoS}_{\text{HE}}$  cathode in POC-0.2IL electrolyte when the assembly of battery was exposure to the air.

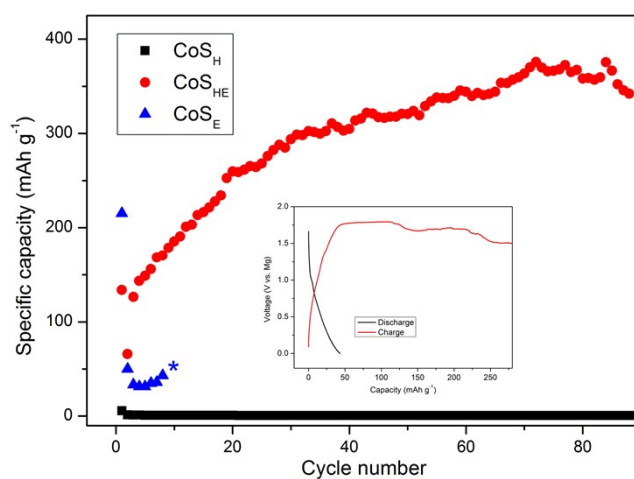

**Figure S13.** The discharge performances of  $\text{CoS}_{\text{H}}$ ,  $\text{CoS}_{\text{HE}}$  and  $\text{CoS}_{\text{E}}$  cathodes in POC-0.2IL electrolyte. The mark (\*) denotes the battery is going to be dead. Insert: the discharge-charge curves of  $\text{CoS}_{\text{E}}$  cathode in the last cycle (8th).

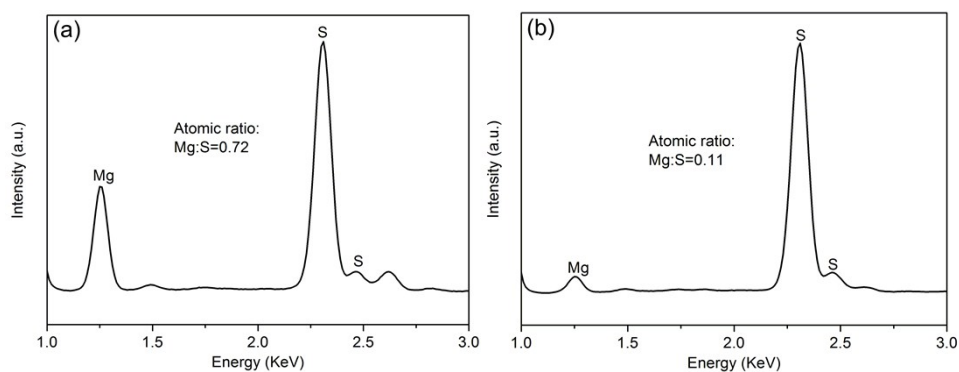

**Figure S14.** Partial EDX spectra of  $\text{CoS}_{\text{HE}}$  cathode (a) after 70th discharge and (b) after 70th charge, respectively. The content of Co is not real in the EDX spectra because of its magnetic property so that the data are not given. And we assume that the content of S after 70th discharge should be the same with that after 70th charge.

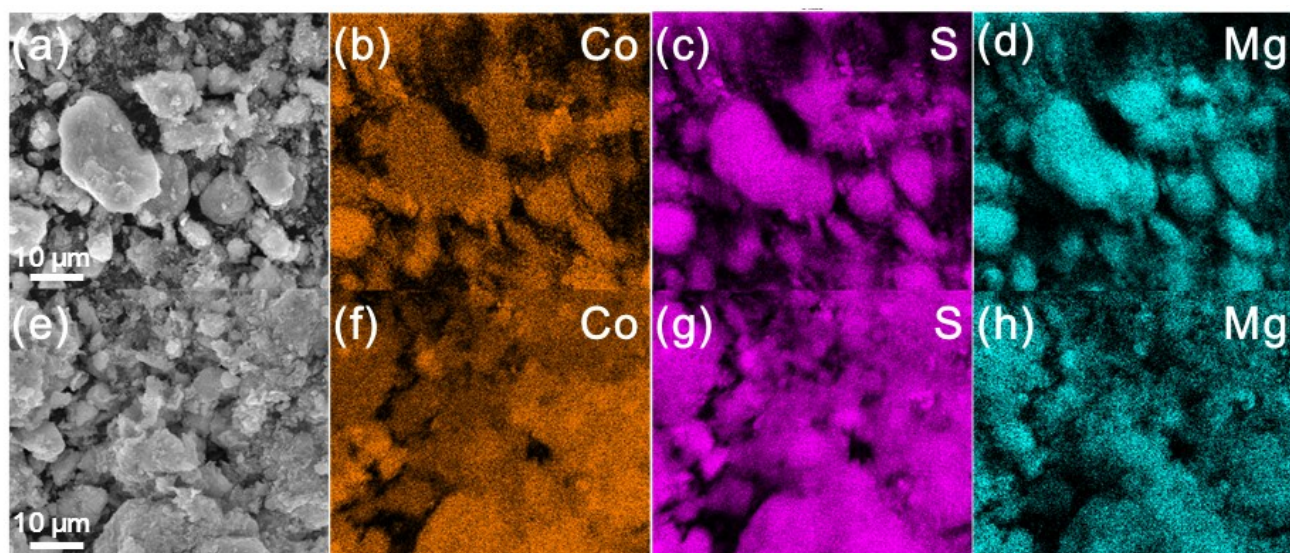

**Figure S15.** (a) SEM image of CoS<sub>HE</sub> cathode after 70th discharge, and cooresponding (b) Co, (c) S, (d) Mg elemental mapping images; (e) SEM image of CoS<sub>HE</sub> cathode after 70th charge, and cooresponding (f) Co, (g) S, (h) Mg elemental mapping images.

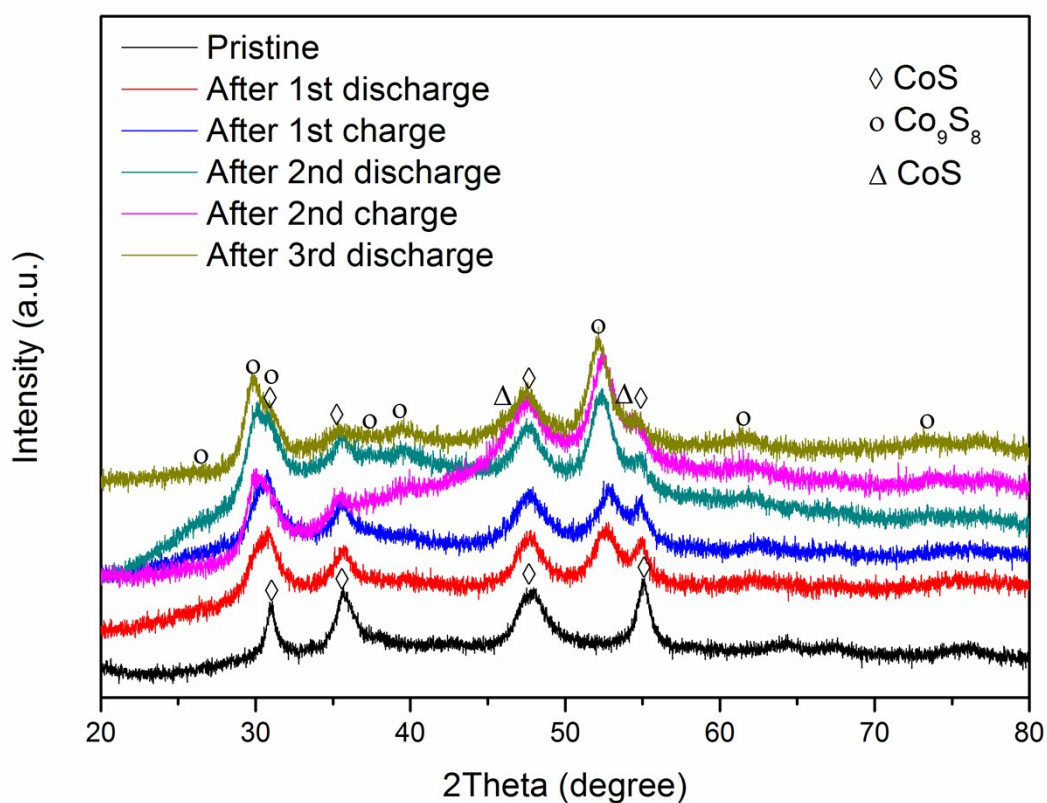

**Figure S16.** Ex situ XRD patterns of CoS<sub>HE</sub> at the pristine state and after initial discharge-charge cycles.
